# Supplementary material
Source: PubMed Central journal article supplement (PMC3562499)
Supplement: NIHMS436156-supplement-01.pdf [file NIHMS436156-supplement-01.pdf]

## SUPPORTING INFORMATION

To fully elucidate the differences between treatment groups, thorough statistical analysis of tumor growth curves and survival curves (Figure 1) were carried out. Pairwise group comparisons were performed and the calculated p-values are presented in Supporting Information (SI) Tables 1 and 2. This material is available free of charge via the Internet at <http://pubs.acs.org>.

**SI Table 1.** *P-values for pairwise group comparisons of the tumor growth curves*

| Treatment vs Treatment                    | Pr > F |
|-------------------------------------------|--------|
| AdOVA vs AdLacZ+CpG+Chitosan              | <.0001 |
| AdOVA+Chitosan vs AdLacZ+CpG+Chitosan     | <.0001 |
| AdOVA+CpG vs AdLacZ+CpG+Chitosan          | <.0001 |
| AdOVA+CpG+Chitosan vs AdLacZ+CpG+Chitosan | <.0001 |
| AdOVA vs AdOVA+Chitosan                   | 0.0133 |
| AdOVA vs AdOVA+CpG                        | 0.0195 |
| AdOVA vs AdOVA+CpG+Chitosan               | 0.1630 |
| AdOVA+Chitosan vs AdOVA+CpG               | 0.0002 |
| AdOVA+Chitosan vs AdOVA+CpG+Chitosan      | 0.2596 |
| AdOVA+CpG vs AdOVA+CpG+Chitosan           | 0.0006 |

**SI Table 2.** *P-values for pairwise group comparisons of survival*

| Treatment vs Treatment |                     | P-value |
|------------------------|---------------------|---------|
| AdOVA                  | AdOVA+Chitosan      | 0.0949  |
| AdOVA                  | AdOVA+CpG           | 0.5301  |
| AdOVA                  | AdOVA+CpG+Chitosan  | 0.5132  |
| AdOVA                  | AdLacZ+CpG+Chitosan | 0.0050  |
| AdOVA+Chitosan         | AdOVA+CpG           | 0.0132  |
| AdOVA+Chitosan         | AdOVA+CpG+Chitosan  | 0.3611  |
| AdOVA+Chitosan         | AdLacZ+CpG+Chitosan | 0.3310  |
| AdOVA+CpG              | AdOVA+CpG+Chitosan  | 0.1849  |
| AdOVA+CpG              | AdLacZ+CpG+Chitosan | 0.0001  |
| AdOVA+CpG+Chitosan     | AdLacZ+CpG+Chitosan | 0.0539  |
